# Supplementary material for: Conformational motions and ligand-binding underlying gating and regulation in IP3R channel
Source: PubMed Central journal article supplement (PMC9663519; doi:10.1038/s41467-022-34574-1), 2022-11-14
Supplement: 41467_2022_34574_MOESM3_ESM.pdf [file 41467_2022_34574_MOESM3_ESM.pdf]

### Description of Additional Supplementary Files

File Name: Supplementary Movie 1

Description: **Three-dimensional variability analysis shows motions of CIA-IP<sub>3</sub>R1 and Ca-IP<sub>3</sub>R1** (the structure is viewed along the membrane plane).

File Name: Supplementary Movie 2

Description: **Three-dimensional variability analysis shows motions in CIA-IP<sub>3</sub>R1** viewed along the channel four-fold axis from cytosol.

File Name: Supplementary Movie 3

Description: **Three-dimensional variability analysis shows motions of CIA-IP<sub>3</sub>R1** in nexus region viewed from cytosol (left) and lumen (right).
